# Supplementary material
Source: PubMed Central journal article supplement (PMC5837865)

## Supplementary Figure 1

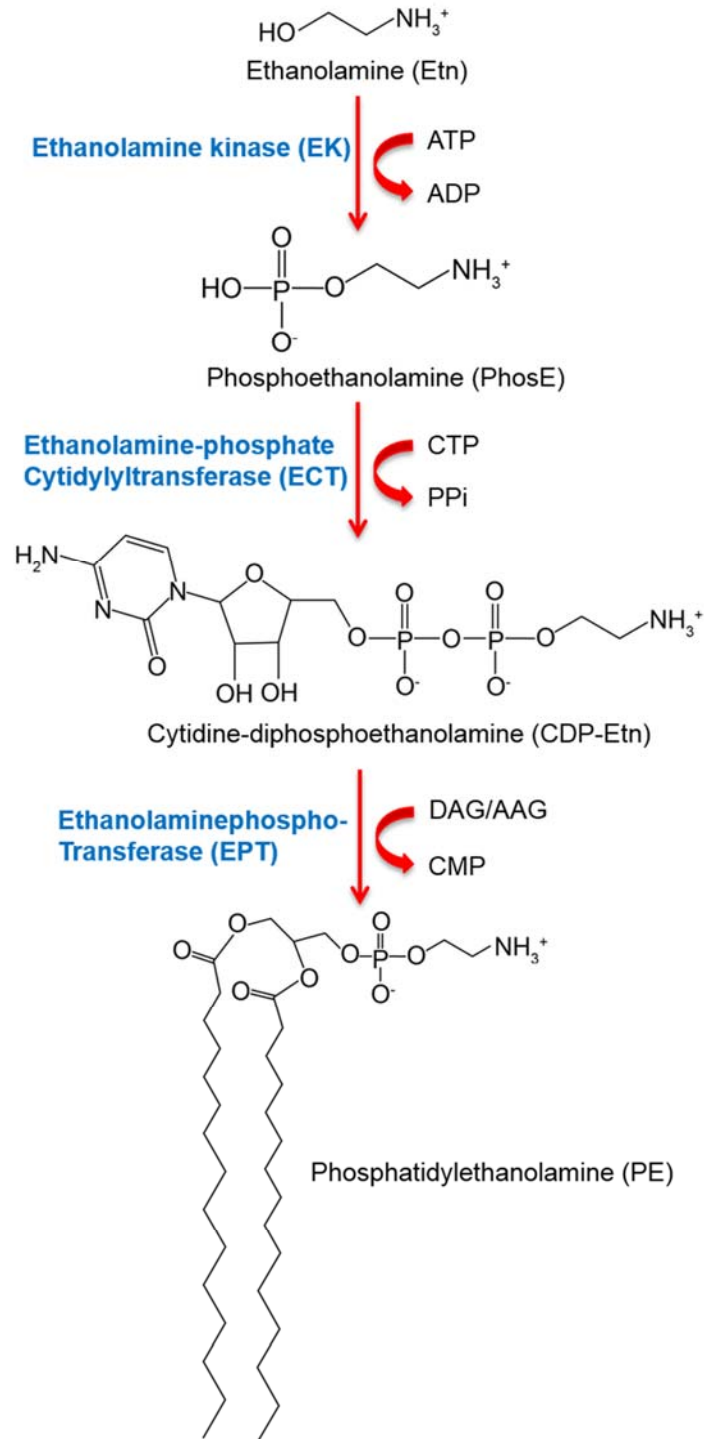

## Supplementary Figure 2

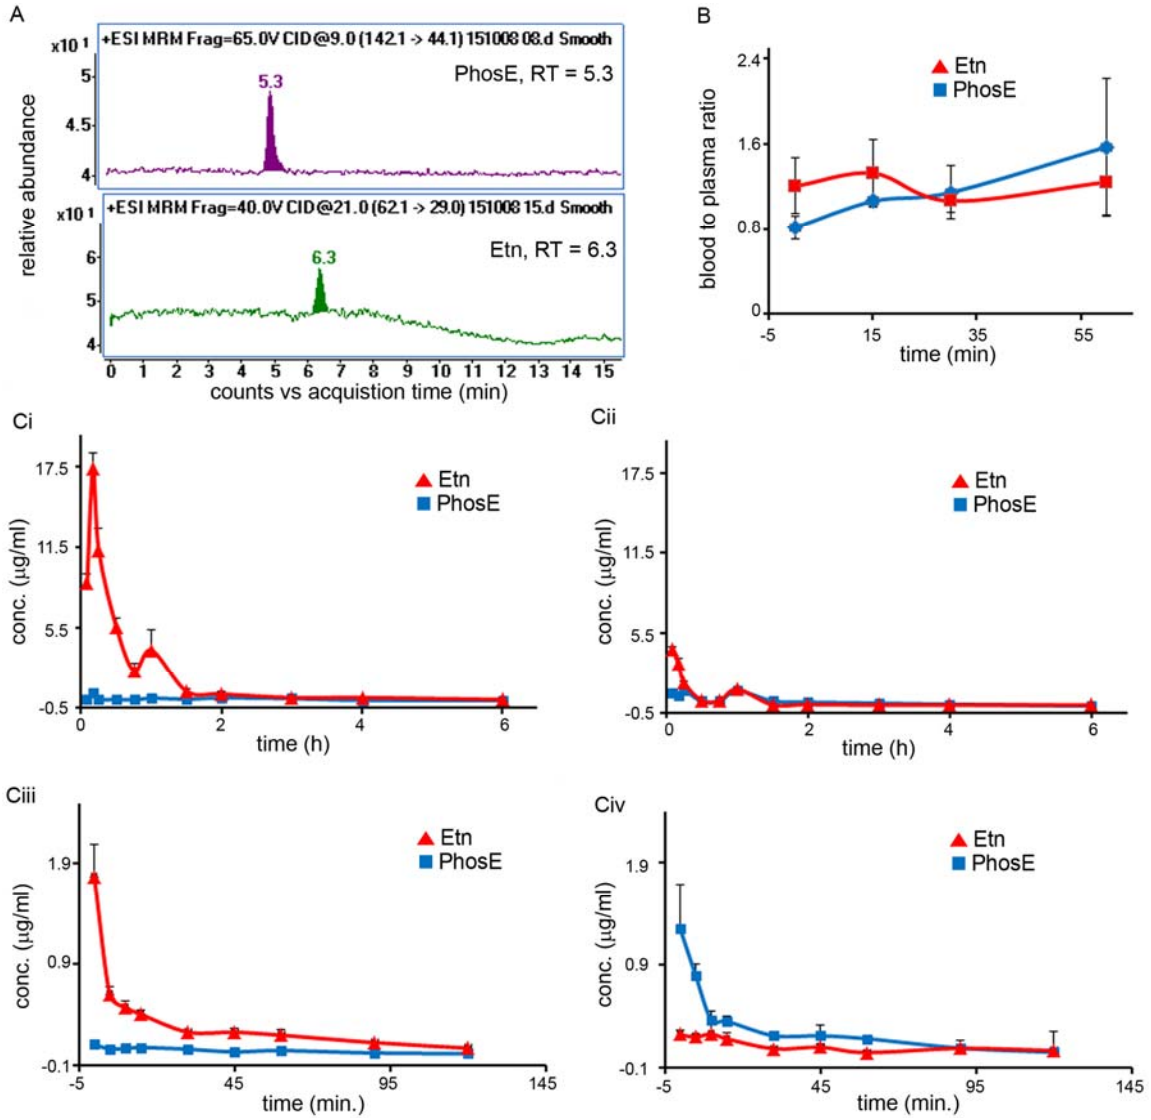

### Supplementary Figure 3

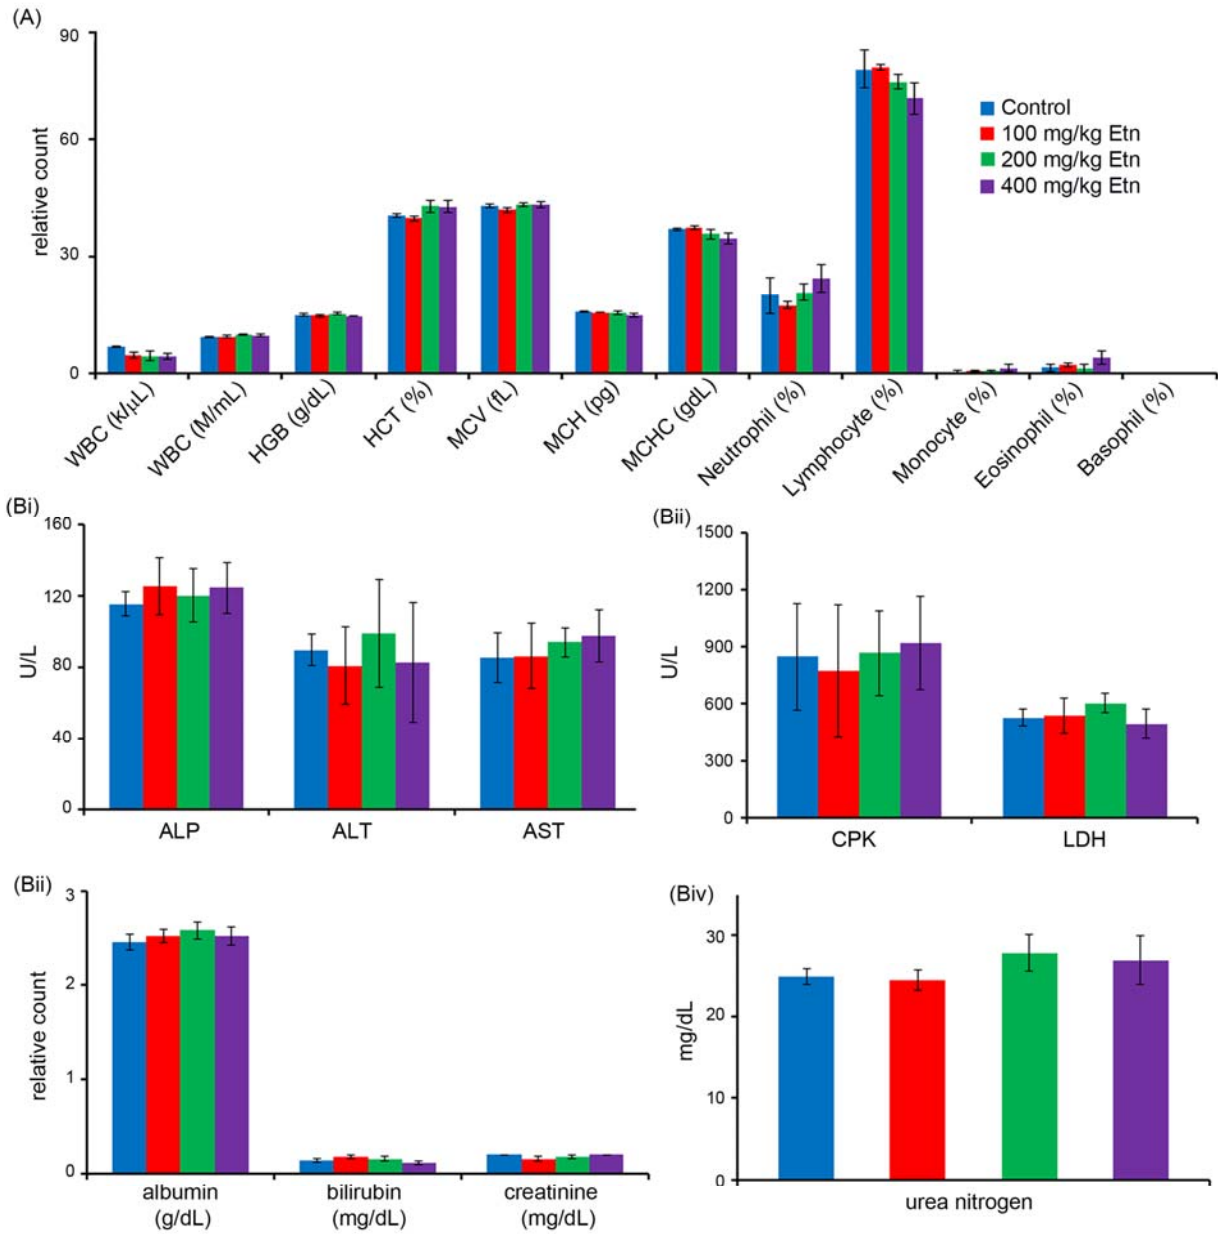

### Supplementary Figure 4

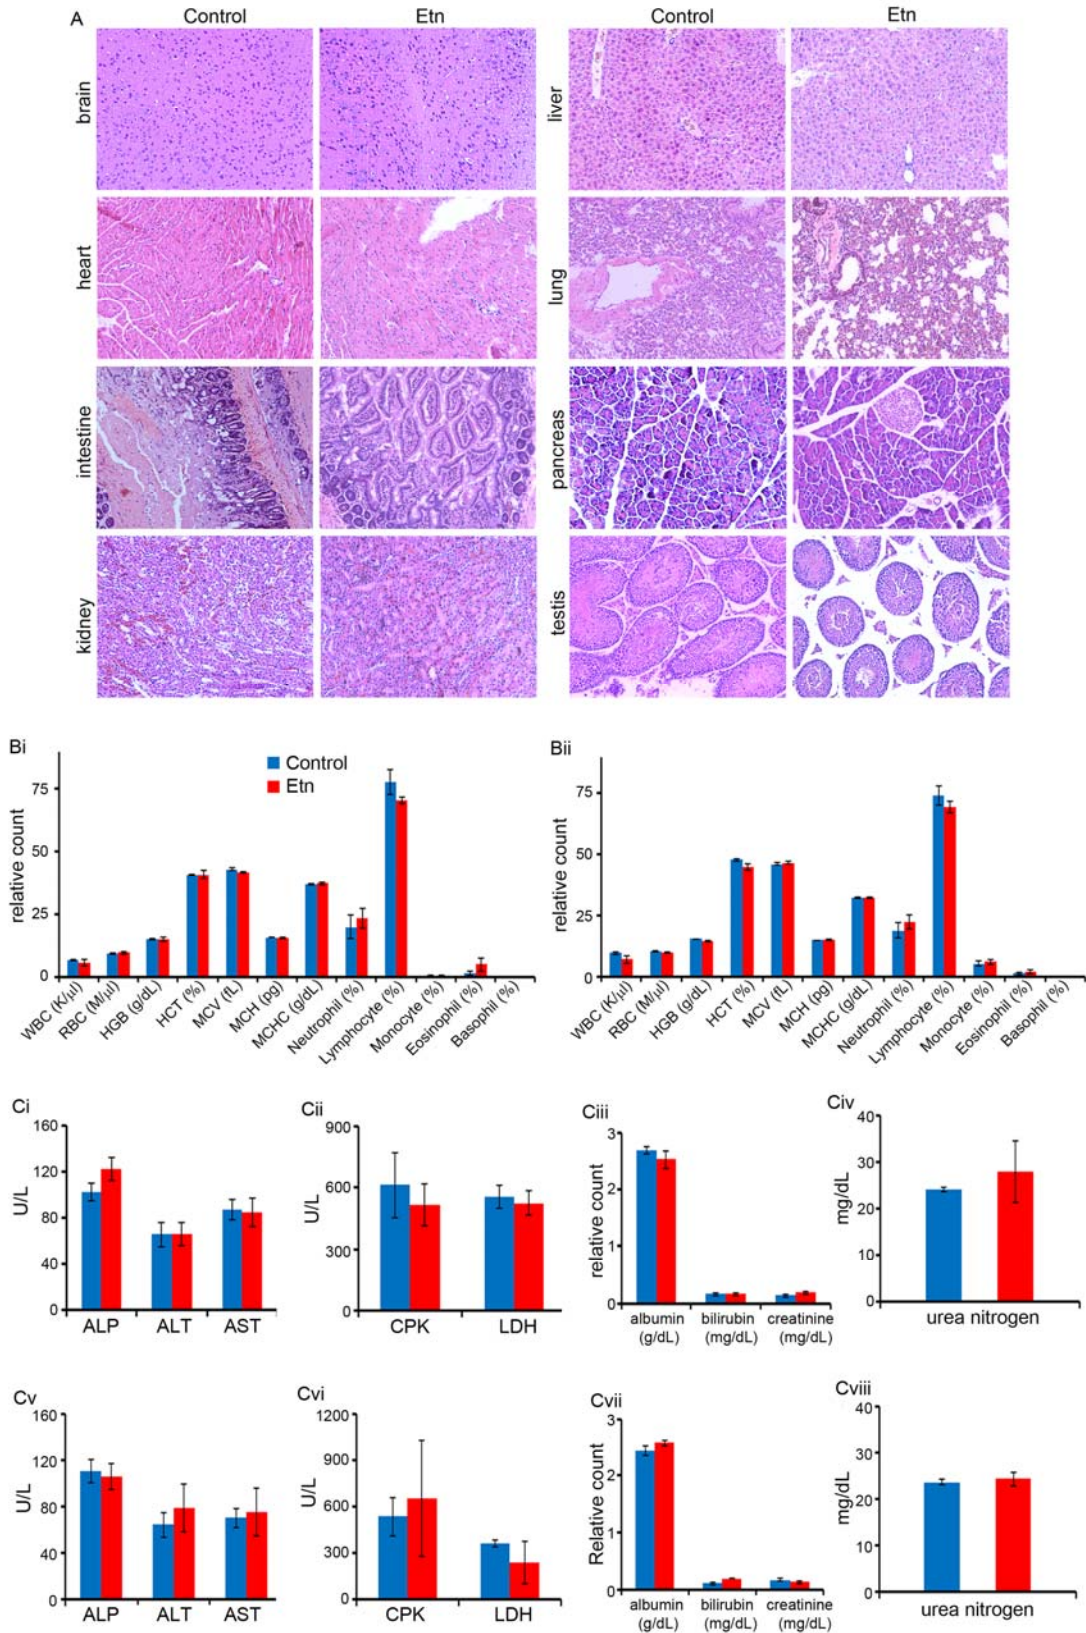

### Supplementary Figure 5

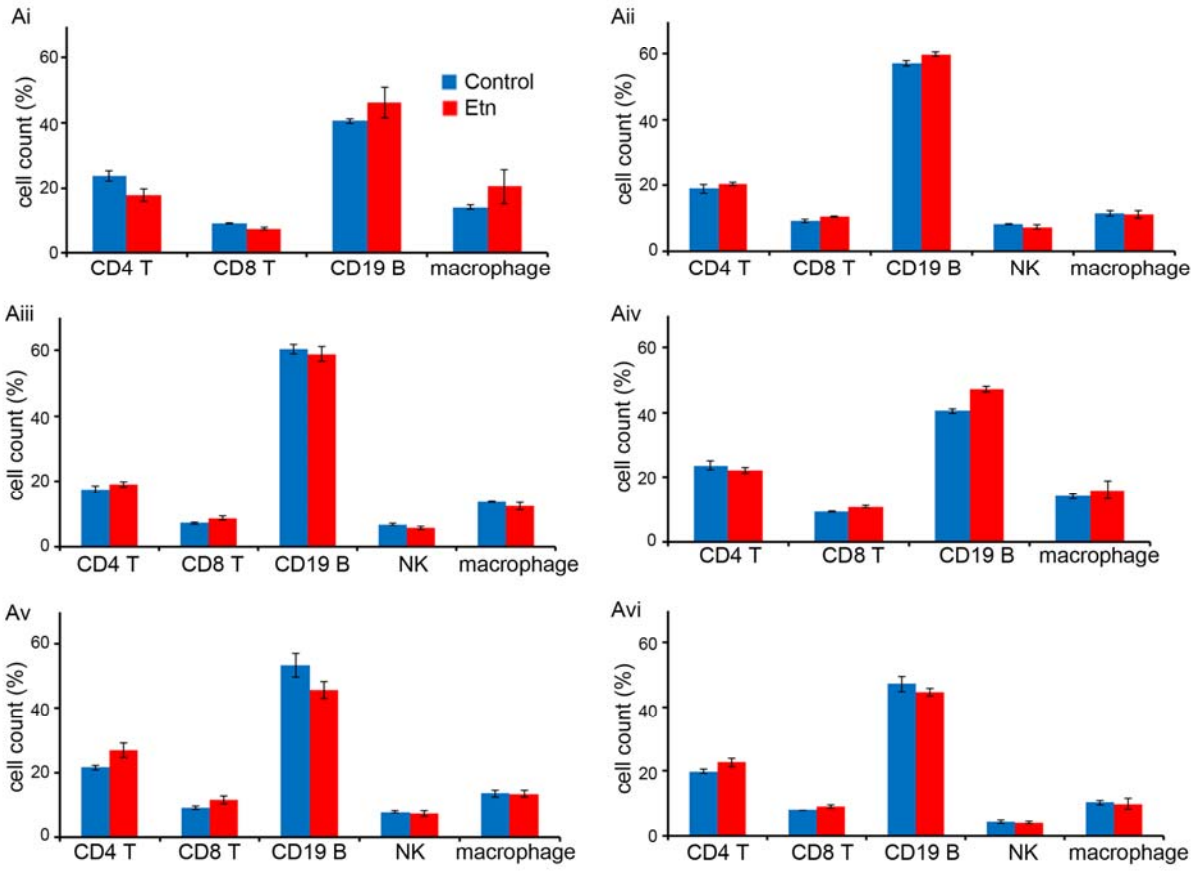

### Supplementary Figure 6

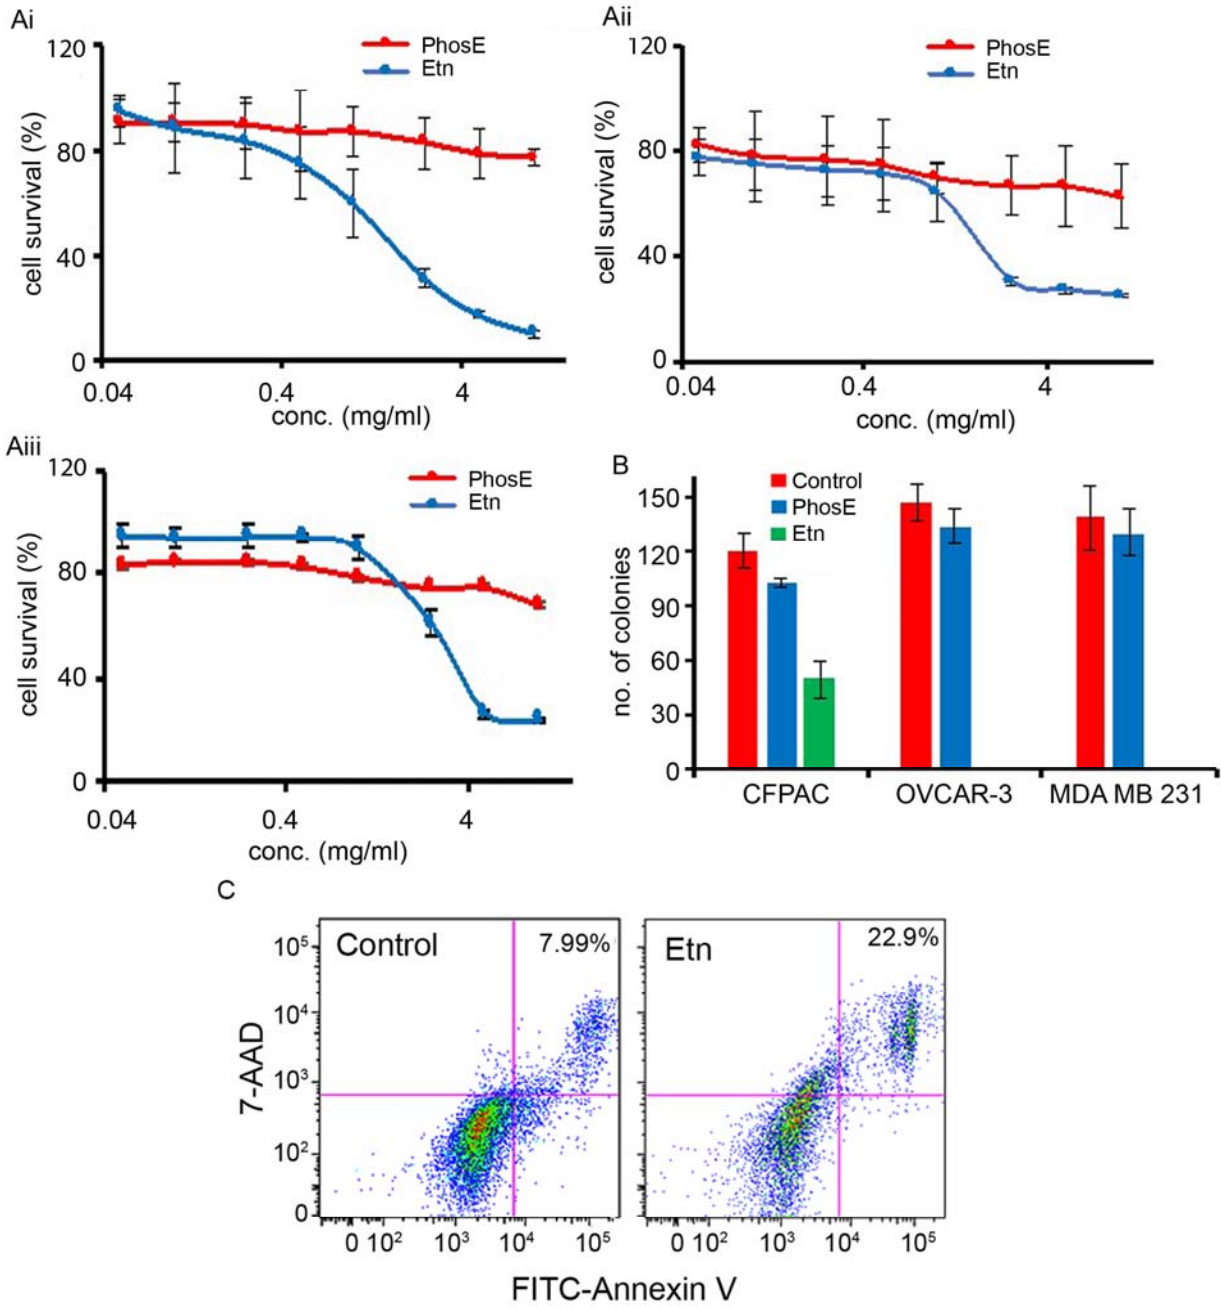

Supplementary Figure 7

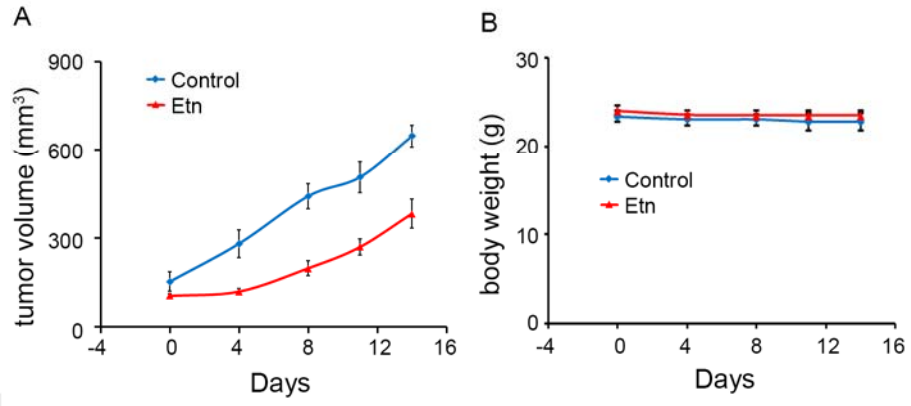

### Supplementary Figure 8

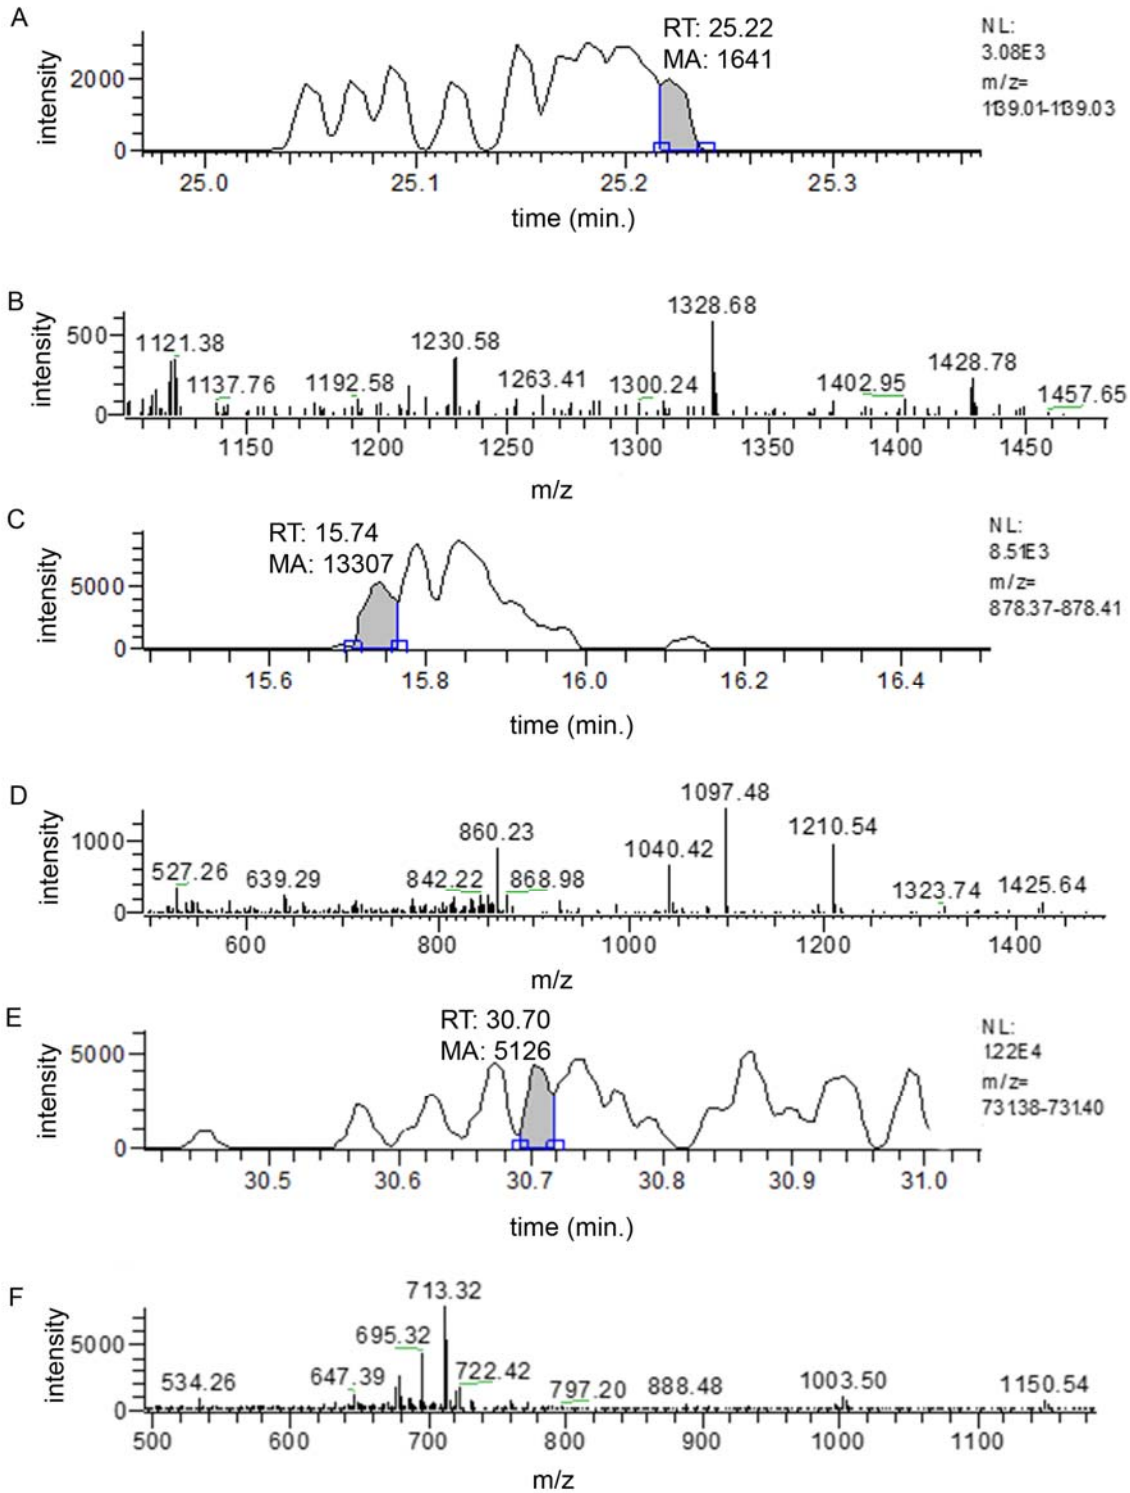

Supplement: NIHMS850678-supplement-1.pdf [file NIHMS850678-supplement-1.pdf]
